# Supplementary material
Source: PubMed Central journal article supplement (PMC3613166)
Supplement: supp_ddt034_ddt034supp.pdf [file supp_ddt034_ddt034supp.pdf]

## **SUPPLEMENTARY DATA**

### **Figure S1.**

No differences were observed in IL-12 and IL-23 serum levels between cases and controls, whereas IL-22 levels were significantly increased in cases (n=227 cases and 55 controls). All values expressed as mean  $\pm$  S.E.M. Statistical significance indicated by one symbol ( $p < 0.05$ ), 2-tailed t-test.

### **Figure S2.**

No difference was observed in serum IL-22 levels between risk carriers and non-risk carriers (n=202 affected homozygous risk allele carriers, n=17 affected non-carriers).

### **Figure S3.**

The heatmap shows the 30 genes with the highest fold change in lesional skin from *IL12B* risk allele positive individuals carrying the rs3212227 A allele and increased overlap with genes induced by IFN- $\gamma$ , whereas there was decreased overlap with IL-17, IL-22 and TNF induced signatures.

### **Figure S4.**

The heatmap shows the 30 genes with the highest fold change in lesional skin from *IL12B* risk allele positive individuals carrying the rs6887695 G allele and increased overlap with genes induced by IFN- $\gamma$ , whereas there was decreased overlap with IL-17, IL-22 and TNF induced signatures.

### **Figure S5**

Dose dependent and time course for the average fold change in expression of the *IL12A*, *IL12B*, *IL12A* and *IL1B*.

### **Supplementary Table 1.**

Genotypes of patients for the *IL12B* SNPs used in microarray experiment.

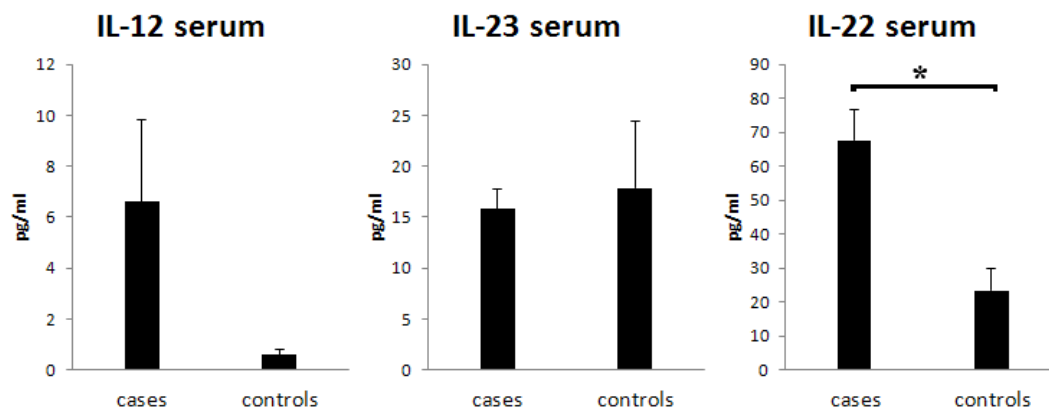

**Supplementary Figure 1**

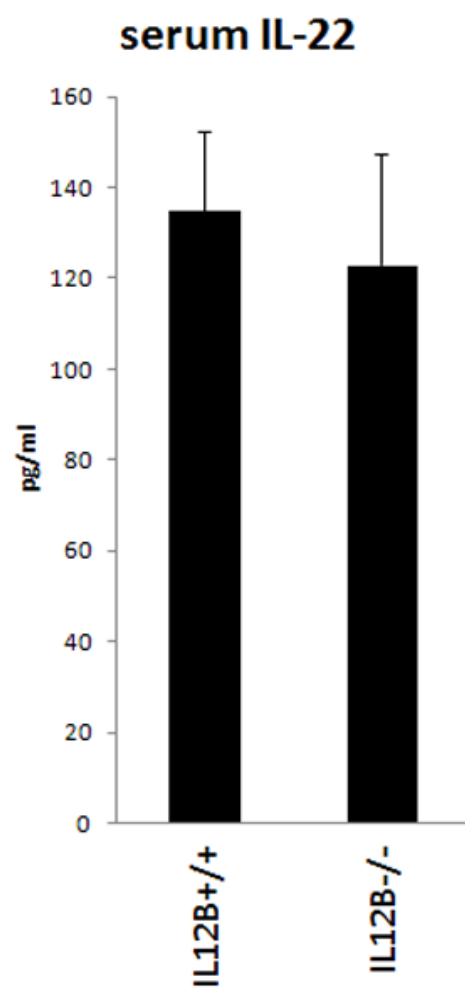

**Supplementary Figure 2**

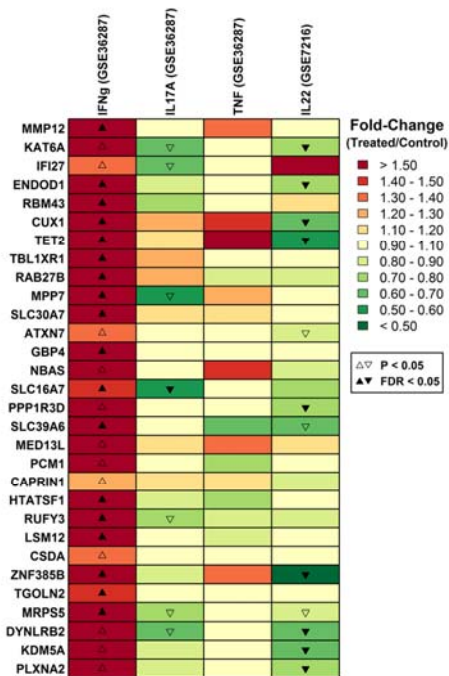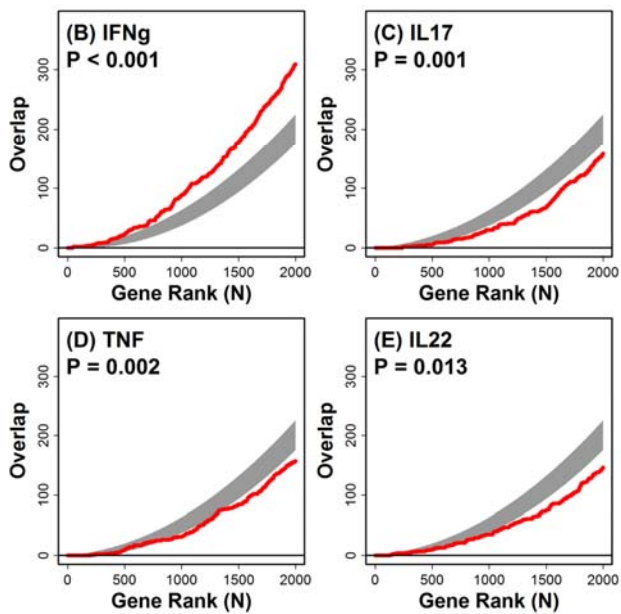

Supplementary Figure 3

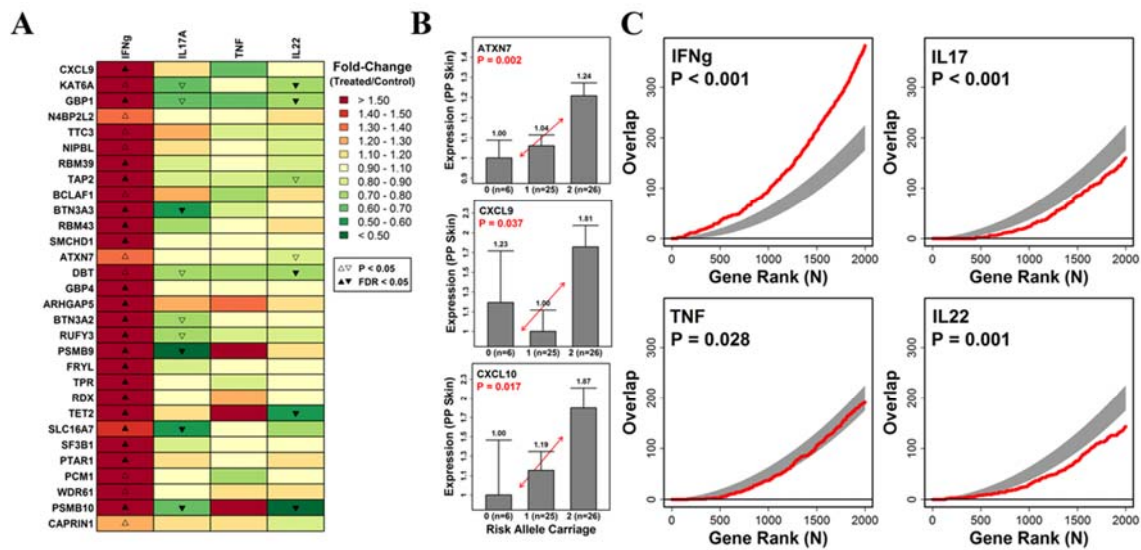

Supplementary Figure 4

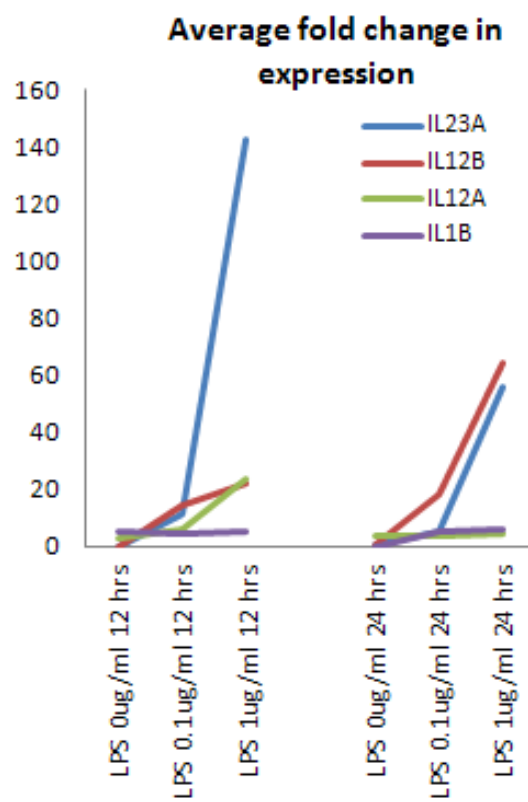

**Supplementary Figure 5**
